# Supplementary material for: Prediction of Early Recurrence of Solitary Hepatocellular Carcinoma after Orthotopic Liver Transplantation
Source: PubMed Central journal article supplement (PMC6825189; doi:10.1038/s41598-019-52427-8), 2019-11-01
Supplement: 41598_2019_52427_MOESM1_ESM.pdf [file 41598_2019_52427_MOESM1_ESM.pdf]

## Supplementary materials

**Title:** Prediction of Early Recurrence of Solitary Hepatocellular Carcinoma after Orthotopic Liver Transplantation

**Authors:** Jiliang Feng<sup>1†</sup>, Ruidong Zhu<sup>2†</sup>, Dezhao Feng<sup>3</sup>, Lu Yu<sup>1</sup>, Dawei Zhao<sup>4</sup>, Jushan Wu<sup>2</sup>, Chunwang Yuan<sup>5</sup>, Junmei Chen<sup>6</sup>, Yan Zhang<sup>1</sup>, Xiu Zheng<sup>1</sup>

### Table of contents:

Supplemental Table 1. Multicollinearity analysis

Supplemental Table 2. Comparing the performance of the model with single predictors and other criteria in the two cohorts

Supplemental Table 3. Test the statistical significance of the difference between the AUCs

Supplemental Table 4. Baseline clinical characteristics of patients in the validation cohort

**Supplemental Table 1: Multicollinearity analysis**

| Variable                             | Adjusted R <sup>2</sup> | Unstandardized |            | Standardized |        | t     | P     | Tolerance | VIF |
|--------------------------------------|-------------------------|----------------|------------|--------------|--------|-------|-------|-----------|-----|
|                                      |                         | Coefficients   |            | Coefficients |        |       |       |           |     |
|                                      |                         | B              | Std. Error | Beta         |        |       |       |           |     |
| <b>Cirrhosis</b>                     |                         | -0.116         | 0.175      | -0.055       | -0.667 | 0.507 | 0.868 | 1.153     |     |
| <b>Macroscopic vascular invasion</b> |                         | 0.095          | 0.111      | 0.077        | 0.851  | 0.397 | 0.718 | 1.392     |     |
| <b>Microscopic vascular invasion</b> | 0.404                   | 0.142          | 0.079      | 0.156        | 1.793  | 0.076 | 0.789 | 1.268     |     |
| <b>Histological grading</b>          |                         | 0.029          | 0.058      | 0.045        | 0.499  | 0.619 | 0.738 | 1.355     |     |
| <b>CK19/GPC3 sub-typing</b>          |                         | 0.217          | 0.067      | 0.298        | 3.216  | 0.002 | 0.695 | 1.439     |     |
| <b>AFP level</b>                     |                         | 0.152          | 0.085      | 0.162        | 1.803  | 0.075 | 0.742 | 1.348     |     |

---

|                       |       |       |       |       |       |       |       |
|-----------------------|-------|-------|-------|-------|-------|-------|-------|
| <b>Tumor diameter</b> | 0.274 | 0.088 | 0.287 | 3.107 | 0.003 | 0.698 | 1.433 |
|-----------------------|-------|-------|-------|-------|-------|-------|-------|

---

Dependent Variable: recurrence; VIF, variance inflation factor; *Std. Error*, Standard error; CK, cytokeratin; GPC3, glypican 3; AFP, alpha fetoprotein.

A tolerance of less than 0.20 and/or a VIF of 10 and above indicates a multicollinearity problem.

Supplemental Table 2. Comparing the performance of the model with single predictors and other criteria in the two cohorts

| Variable                             | Training cohort |                        |          | Validation cohort |                        |          |
|--------------------------------------|-----------------|------------------------|----------|-------------------|------------------------|----------|
|                                      | AUC             | 95%<br>CI(Lower-Upper) | <i>P</i> | AUC               | 95%<br>CI(Lower-Upper) | <i>P</i> |
| <b>CK19 expression</b>               | 0.612           | 0.484 0.741            | =0.076   | 0.552             | 0.371 0.734            | =0.560   |
| <b>GPC3 expression</b>               | 0.716           | 0.617 0.815            | =0.001   | 0.729             | 0.592 0.865            | =0.011   |
| <b>CK19/GPC3 sub-typing</b>          | 0.767           | 0.673 0.861            | <0.001   | 0.750             | 0.618 0.883            | =0.005   |
| <b>Macroscopic vascular invasion</b> | 0.641           | 0.515 0.768            | =0.026   | 0.486             | 0.300 0.660            | =0.874   |
| <b>Microscopic vascular invasion</b> | 0.679           | 0.567 0.791            | =0.005   | 0.762             | 0.604 0.920            | =0.004   |
| <b>Tumor diameter</b>                | 0.744           | 0.634 0.855            | <0.001   | 0.633             | 0.465 0.802            | =0.138   |
| <b>AFP level</b>                     | 0.730           | 0.619 0.842            | <0.001   | 0.719             | 0.571 0.867            | =0.015   |
| <b>Histological grading</b>          | 0.677           | 0.567 0.786            | =0.005   | 0.730             | 0.572 0.887            | =0.011   |
| <b>Cirrhosis</b>                     | 0.464           | 0.338 0.591            | =0.570   | 0.524             | 0.350 0.697            | =0.791   |
| <b>Milan criteria</b>                | 0.708           | 0.586 0.829            | =0.001   | 0.595             | 0.415 0.775            | =0.290   |
| <b>UCSF criteria</b>                 | 0.646           | 0.518 0.773            | =0.021   | 0.624             | 0.443 0.805            | =0.169   |
| <b>Fudan criteria</b>                | 0.593           | 0.464 0.722            | =0.141   | 0.619             | 0.436 0.802            | =0.186   |
| <b>Hanzhou criteria</b>              | 0.569           | 0.441 0.697            | =0.273   | 0.667             | 0.485 0.848            | =0.064   |
| <b>The novel model</b>               | 0.844           | 0.760 0.929            | <0.001   | 0.876             | 0.759 0.994            | <0.001   |

---

AUC, area under the curve; CI, confidence interval; CK, cytokeratin; GPC3, glypican 3; AFP, alpha-fetal protein; UCSF, the University of California

---

**Supplemental Table 3. Test the statistical significance of the difference between the AUCs**


---

| Variable                | The novel model      |       |                   |                      |       |          |
|-------------------------|----------------------|-------|-------------------|----------------------|-------|----------|
|                         | Training cohort      |       | Validation cohort |                      |       |          |
|                         | 95% CI (Lower-Upper) |       | <i>P</i>          | 95% CI (Lower-Upper) |       | <i>P</i> |
| <b>Milan criteria</b>   | -0.001               | 0.274 | =0.052            | 0.085                | 0.476 | =0.005   |
| <b>UCSF criteria</b>    | 0.055                | 0.342 | =0.007            | 0.055                | 0.450 | =0.012   |
| <b>Fudan criteria</b>   | 0.111                | 0.392 | =0.005            | 0.053                | 0.461 | =0.014   |
| <b>Hanzhou criteria</b> | 0.131                | 0.420 | =0.002            | 0.005                | 0.414 | =0.045   |

---

---

**Supplemental Table 4. Baseline clinical characteristics of patients in the validation cohort**


---

| <b>Variable</b>         |                | <b>Recurrence</b> | <b>No</b> |
|-------------------------|----------------|-------------------|-----------|
| <b>Age, years</b>       | Median( range) | 53(43-61)         | 48(35-73) |
|                         | mean±SD        | 52±4.8            | 50.4±8.3  |
| <b>Gender, n (%)</b>    |                |                   |           |
|                         | male           | 15(30.0)          | 28(56.0)  |
|                         | female         | 0(0.0)            | 7(14.0)   |
| <b>Cirrhosis, n (%)</b> |                |                   |           |
|                         | yes            | 14(28.0)          | 31(62.0)  |
|                         | no             | 1(2.0)            | 4(8.0)    |
| <b>Etiology, n (%)</b>  |                |                   |           |
|                         | HBV infection  | 14(28.0)          | 28(56.0)  |
|                         | HCV infection  | 0(0)              | 4(8.0)    |

---

---

|                         |                              |         |          |
|-------------------------|------------------------------|---------|----------|
|                         | alcohol abuse                | 0(0)    | 0(0)     |
|                         | Budd-Chiari syndrome         | 0(0)    | 0(0)     |
|                         | schistosome infection        | 0(0)    | 0(0)     |
|                         | HBV infection+ alcohol abuse | 0(0)    | 0(0)     |
|                         | HBV+HEV infection            | 0(0)    | 0(0)     |
|                         | HBV+HCV infection            | 1(0)    | 2(4.0)   |
|                         | AIH                          | 0(0)    | 1(2.0)   |
| <b>Child-Pugh score</b> | A                            | 8(16.0) | 11(22.0) |
|                         | B                            | 4(8.0)  | 18(36.0) |
|                         | C                            | 3(6.0)  | 6(12.0)  |
| <b>MELD score</b>       | Median( range)               | 8(2-19) | 8(3-27)  |
| <b>AFP level</b>        |                              |         |          |
|                         | ≤20 ng/mL                    | 1(2.0)  | 13(26.0) |

---



---

|                              |          |          |
|------------------------------|----------|----------|
| >20 ng/ mL, ≤200 ng/mL       | 1(2.0)   | 7(14.0)  |
| >200 ng/ mL, ≤400 ng/mL      | 4(8.0)   | 5(10.0)  |
| >400 ng/ mL                  | 9(18.0)  | 10(20.0) |
| <b>CK19/GPC3</b>             |          |          |
| <b>sub-typing, n (%)</b>     |          |          |
| CK19+/GPC3+                  | 2(4.0)   | 1(2.0)   |
| CK19-/GPC3+                  | 13(26.0) | 18(36.0) |
| CK19-/GPC3-                  | 0(0)     | 16(32.0) |
| <b>Histological grading,</b> |          |          |
| <b>n (%)</b>                 |          |          |
| poorly                       | 10(20.0) | 8(16.0)  |
| moderately                   | 3(6.0)   | 14(28.0) |
| well                         | 2(4.0)   | 13(26.0) |

---

|                                             |            |          |          |
|---------------------------------------------|------------|----------|----------|
| <b>Macroscopic vascular invasion, n (%)</b> | yes        | 0(0)     | 1(2.0)   |
|                                             | no         | 15(30.0) | 34(68.0) |
| <b>Microscopic vascular invasion, n (%)</b> | yes        | 10(20.0) | 5(10.0)  |
|                                             | no         | 5(10.0)  | 30(60.0) |
| <b>Tumor diameter, n (%)</b>                |            |          |          |
|                                             | ≤3cm       | 5(10.0)  | 19(38.0) |
|                                             | >3cm, ≤5cm | 5(10.0)  | 11(22.0) |
|                                             | >5cm       | 5(10.0)  | 5(10.0)  |
| <b>Milan criteria, n (%)</b>                |            |          |          |
|                                             | within     | 10(20.0) | 30(60.0) |

---

|                                 |        |          |           |
|---------------------------------|--------|----------|-----------|
|                                 | beyond | 5(10.0)  | 5(10.0)   |
| <b>UCSF criteria, n (%)</b>     |        |          |           |
|                                 | within | 10(20.0) | 32 (64.0) |
|                                 | beyond | 5(10.0)  | 3(6.0)    |
| <b>Fudan criteria, n (%)</b>    |        |          |           |
|                                 | within | 11(22.0) | 34(68.0)  |
|                                 | beyond | 4(8.0)   | 1(2.0)    |
| <b>Hangzhou criteria, n (%)</b> |        |          |           |
|                                 | within | 10(20.0) | 35(70.0)  |
|                                 | beyond | 5(10.0)  | 0(0.0)    |

---

SD, standard deviation; HBV, hepatitis C virus; HCV, hepatitis C virus; CK19, cytokeratin 19; GPC3, glypican 3; UCSF, University of California, San Francisco
